# Supplementary material for: Whole genome analyses of CMY-2-producing Escherichia coli isolates from humans, animals and food in Germany
Source: PubMed Central journal article supplement (PMC6085623; doi:10.1186/s12864-018-4976-3), 2018-08-09

Inck2 plasmid variants

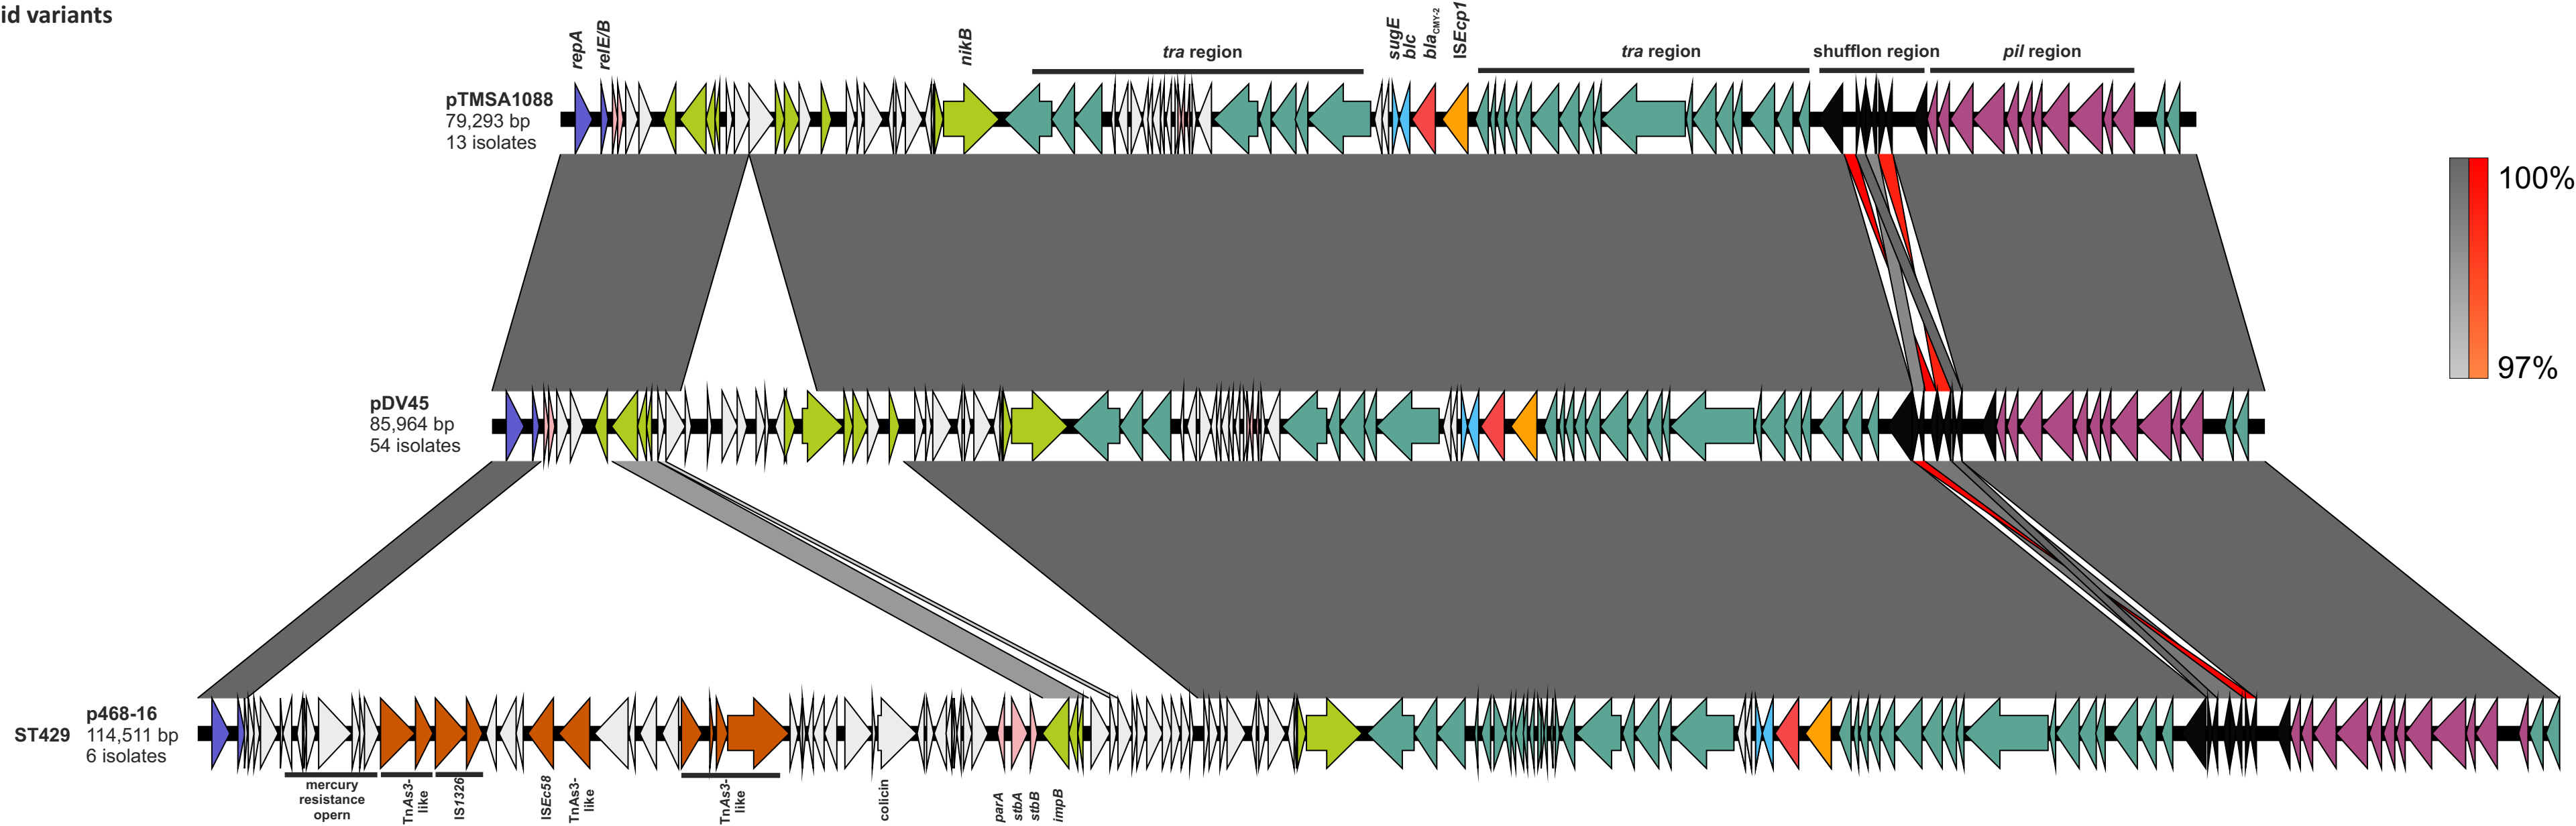

Supplement: 12864_2018_4976_MOESM5_ESM.pdf [file 12864_2018_4976_MOESM5_ESM.pdf]
